# Supplementary material for: Structure-symptom relationship with wide-area ultrasound scanning of knee osteoarthritis
Source: PubMed Central journal article supplement (PMC5353612; doi:10.1038/srep44470), 2017-03-15
Supplement: srep44470-s1.pdf [file srep44470-s1.pdf]

# **Structure-symptom relationship with wide-area ultrasound scanning of knee osteoarthritis**

<sup>1</sup>Jana Podlipská (jana.podlipska@oulu.fi); <sup>2</sup>Juhani M. Koski (f.koski@fimnet.fi); <sup>3,4</sup>Päivi Kaukinen (paivi.kaukinen@kuh.fi); <sup>5,6,7</sup>Marianne Haapea (marianne.haapea@oulu.fi); <sup>1,5,6</sup>Osmo Tervonen (osmo.tervonen@oulu.fi); <sup>3,4</sup>Jari P. Arokoski (jari.arokoski@kuh.fi); <sup>1,5,6</sup>Simo Saarakkala (simo.saarakkala@oulu.fi)

Supplementary Table S1: Association of ultrasound-defined cartilage degeneration with WOMAC subscales presented as an incidence rate ratio (IRR) and 95% confidence interval (95% CI)

| Cartilage      | Grade | n (%)   | WOMAC pain                |         |                           |         | WOMAC stiffness           |         |                           |       | WOMAC function            |         |                           |       |
|----------------|-------|---------|---------------------------|---------|---------------------------|---------|---------------------------|---------|---------------------------|-------|---------------------------|---------|---------------------------|-------|
|                |       |         | IRR <sup>1</sup> (95% CI) | p       | IRR <sup>2</sup> (95% CI) | p       | IRR <sup>1</sup> (95% CI) | p       | IRR <sup>2</sup> (95% CI) | p     | IRR <sup>1</sup> (95% CI) | p       | IRR <sup>2</sup> (95% CI) | p     |
| Medial         | 0     | 23 (16) | #                         | #       | #                         | #       | #                         | #       | #                         | #     | #                         | #       | #                         |       |
|                | 1     | 48 (34) | 2.5 (1.3, 4.6)            | 0.004   | 2.0 (1.0, 4.1)            | 0.055   | 3.0 (1.7, 5.5)            | < 0.001 | 2.8 (1.4, 5.7)            | 0.004 | 3.5 (1.8, 6.8)            | < 0.001 | 2.6 (1.2, 5.7)            | 0.014 |
|                | 2a    | 40 (28) | 4.9 (2.6, 9.2)            | < 0.001 | 2.6 (1.2, 5.8)            | 0.021   | 6.3 (3.4, 11.8)           | < 0.001 | 3.3 (1.5, 7.4)            | 0.003 | 6.1 (3.1, 12.1)           | < 0.001 | 3.0 (1.2, 7.3)            | 0.015 |
|                | 2b    | 20 (14) | 5.6 (2.7, 11.5)           | < 0.001 | 1.8 (0.6, 5.5)            | 0.272   | 8.8 (4.3, 18.1)           | < 0.001 | 3.8 (1.3, 11.1)           | 0.014 | 8.6 (3.9, 18.8)           | < 0.001 | 2.8 (0.9, 9.1)            | 0.087 |
|                | 3     | 11 (8)  | 10.6 (4.4, 25.3)          | < 0.001 | 2.7 (0.7, 10.8)           | 0.149   | 22.8 (9.6, 54.1)          | < 0.001 | 7.7 (2.1, 27.9)           | 0.002 | 15.4 (6.0, 39.8)          | < 0.001 | 4.1 (1.0, 17.7)           | 0.057 |
| Sulcus         | 0     | 37 (26) | #,§                       | #       | #,§                       | #       | #,§                       | #,§     | #,§                       | #,§   | #,§                       | #,§     | #                         |       |
|                | 1     | 45 (32) | 1.1 (0.6, 2.0)            | 0.701   | 1.1 (0.6, 1.9)            | 0.860   | 0.7 (0.4, 1.3)            | 0.278   | 0.6 (0.3, 1.1)            | 0.092 | 1.9 (1.1, 3.3)            | 0.025   | 1.7 (0.9, 3.0)            | 0.078 |
|                | 2a    | 31 (22) | 2.9 (1.6, 5.0)            | < 0.001 | 2.1 (1.2, 3.8)            | 0.015   | 2.4 (1.3, 4.3)            | 0.003   | 1.4 (0.8, 2.7)            | 0.270 | 4.2 (2.3, 7.4)            | < 0.001 | 3.0 (1.6, 5.5)            | 0.001 |
|                | 2b    | 20 (14) | 3.3 (1.8, 6.0)            | < 0.001 | 2.2 (1.1, 4.4)            | 0.027   | 3.0 (1.6, 5.6)            | 0.001   | 1.5 (0.7, 3.0)            | 0.293 | 5.1 (2.7, 9.5)            | < 0.001 | 3.2 (1.6, 6.6)            | 0.002 |
|                | 3     | 9 (6)   | 3.3 (1.4, 7.7)            | 0.007   | 2.1 (0.8, 5.4)            | 0.131   | 4.2 (1.7, 10.2)           | 0.002   | 1.5 (0.6, 4.3)            | 0.402 | 6.0 (2.6, 14.1)           | < 0.001 | 3.5 (1.4, 9.2)            | 0.010 |
| Lateral        | 0     | 58 (41) | #,§                       | #,§     | #,§                       | #,§     | #,§                       | #,§     | #,§                       | #,§   | #,§                       | #,§     | #,§                       |       |
|                | 1     | 52 (37) | 1.5 (1.0, 2.3)            | 0.048   | 0.9 (0.6, 1.5)            | 0.713   | 1.7 (1.1, 2.5)            | 0.014   | 1.1 (0.7, 1.7)            | 0.638 | 1.7 (1.1, 2.6)            | 0.012   | 1.0 (0.6, 1.6)            | 0.992 |
|                | 2a    | 27 (19) | 1.8 (1.1, 3.1)            | 0.026   | 1.2 (0.6, 2.2)            | 0.595   | 2.3 (1.4, 3.9)            | 0.002   | 1.7 (1.0, 3.0)            | 0.072 | 2.6 (1.5, 4.4)            | < 0.001 | 1.6 (0.9, 2.9)            | 0.128 |
|                | 2b    | 5 (4)   | 2.8 (1.1, 7.1)            | 0.031   | 1.9 (0.7, 5.2)            | 0.200   | 5.9 (2.3, 14.9)           | < 0.001 | 3.8 (1.4, 10.1)           | 0.009 | 3.8 (1.5, 9.7)            | 0.005   | 2.7 (1.0, 7.4)            | 0.051 |
|                | 3     | 0 (0)   | -                         | -       | -                         | -       | -                         | -       | -                         | -     | -                         | -       | -                         |       |
| Global femoral | 0     | 15 (11) | #                         | #       | #                         | #       | #                         | #       | #                         | #     | #                         | #       | #                         |       |
|                | 1     | 35 (25) | 4.0 (1.7, 9.7)            | 0.002   | 3.7 (1.5, 9.0)            | 0.005   | 3.7 (1.5, 9.3)            | 0.004   | 2.8 (1.1, 7.3)            | 0.030 | 3.8 (1.5, 9.5)            | 0.004   | 3.1 (1.2, 8.1)            | 0.019 |
|                | 2a    | 45 (32) | 10.4 (4.3, 25.0)          | < 0.001 | 9.0 (2.9, 27.9)           | < 0.001 | 11.7 (4.7, 29.0)          | < 0.001 | 6.7 (2.3, 20.1)           | 0.001 | 7.6 (3.0, 19.3)           | < 0.001 | 4.9 (1.6, 15.0)           | 0.006 |
|                | 2b    | 29 (20) | 17.5 (6.9, 44.4)          | < 0.001 | 10.7 (3.3, 34.9)          | < 0.001 | 26.2 (9.9, 69.8)          | < 0.001 | 10.5 (3.3, 34.1)          | 0.000 | 16.2 (6.1, 42.6)          | < 0.001 | 7.6 (2.3, 25.1)           | 0.001 |
|                | 3     | 18 (13) | 20.4 (7.4, 56.7)          | < 0.001 | 10.0 (2.5, 39.0)          | 0.001   | 35.0 (12.4, 98.9)         | < 0.001 | 11.7 (3.0, 44.8)          | 0.000 | 18.9 (6.5, 54.7)          | < 0.001 | 7.5 (1.9, 29.4)           | 0.004 |

WOMAC – Western Ontario and McMaster Universities Osteoarthritis Index, VAS – visual analogue scale

<sup>1</sup> Adjusted for gender, age and body mass index (BMI).

<sup>2</sup> Adjusted for gender, age, BMI, global osteophyte grade, and medial and lateral meniscal extrusion.

# BMI also significantly associated in the model ( $p < 0.05$ ); § age also significantly associated in the model ( $p < 0.05$ )

Supplementary Table S2: Association of ultrasound-defined osteophytes with WOMAC subscales presented as an incidence rate ratio (IRR) and 95% confidence interval (95% CI)

| Osteophytes         | Grade | n (%)   | WOMAC pain                |         |                           |       | WOMAC stiffness           |         |                           |         | WOMAC function            |         |                           |       |
|---------------------|-------|---------|---------------------------|---------|---------------------------|-------|---------------------------|---------|---------------------------|---------|---------------------------|---------|---------------------------|-------|
|                     |       |         | IRR <sup>1</sup> (95% CI) | p       | IRR <sup>2</sup> (95% CI) | p     | IRR <sup>1</sup> (95% CI) | p       | IRR <sup>2</sup> (95% CI) | p       | IRR <sup>1</sup> (95% CI) | p       | IRR <sup>2</sup> (95% CI) | p     |
| Medial femoral      | 0     | 73 (51) |                           | #,§     |                           | #     |                           | #,§     |                           | #       |                           | #,§     |                           | #     |
|                     | 1     | 31 (22) | 3.2 (2.1, 5.0)            | < 0.001 | 2.0 (1.2, 3.5)            | 0.013 | 4.7 (3.0, 7.4)            | < 0.001 | 2.8 (1.6, 4.8)            | < 0.001 | 3.4 (2.2, 5.4)            | < 0.001 | 2.3 (1.3, 4.1)            | 0.003 |
|                     | 2     | 17 (12) | 3.0 (1.7, 5.3)            | < 0.001 | 2.1 (1.0, 4.5)            | 0.043 | 4.4 (2.5, 7.7)            | < 0.001 | 2.4 (1.1, 4.9)            | 0.022   | 3.2 (1.8, 5.6)            | < 0.001 | 2.1 (1.0, 4.3)            | 0.054 |
|                     | 3     | 21 (15) | 5.0 (2.9, 8.4)            | < 0.001 | 3.7 (1.2, 11.3)           | 0.023 | 8.7 (5.1, 14.7)           | < 0.001 | 3.0 (1.0, 9.2)            | 0.052   | 5.5 (3.2, 9.4)            | < 0.001 | 3.3 (1.1, 9.8)            | 0.028 |
| Lateral femoral     | 0     | 79 (56) |                           | #,§     |                           | #     |                           | #,§     |                           | #       |                           | #,§     |                           | #     |
|                     | 1     | 25 (18) | 2.8 (1.7, 4.5)            | < 0.001 | 1.9 (1.1, 3.3)            | 0.014 | 4.3 (2.7, 7.0)            | < 0.001 | 3.0 (1.0, 9.2)            | < 0.001 | 3.0 (1.8, 4.9)            | < 0.001 | 2.2 (1.3, 3.8)            | 0.005 |
|                     | 2     | 18 (13) | 4.0 (2.4, 6.9)            | < 0.001 | 2.6 (1.3, 5.0)            | 0.005 | 5.7 (3.4, 9.8)            | < 0.001 | 2.4 (1.1, 4.9)            | 0.003   | 4.6 (2.7, 7.9)            | < 0.001 | 2.7 (1.4, 5.4)            | 0.004 |
|                     | 3     | 20 (14) | 3.7 (2.2, 6.2)            | < 0.001 | 2.6 (1.2, 5.9)            | 0.018 | 6.6 (3.9, 11.3)           | < 0.001 | 2.8 (1.6, 4.8)            | 0.027   | 4.1 (2.4, 6.9)            | < 0.001 | 2.5 (1.1, 5.5)            | 0.026 |
| Medial tibial       | 0     | 74 (52) |                           | #,§     |                           | #     |                           | #,§     |                           | #       |                           | #,§     |                           | #     |
|                     | 1     | 41 (29) | 1.7 (1.1, 2.5)            | 0.011   | 1.0 (0.6, 1.6)            | 0.939 | 1.3 (0.8, 1.9)            | 0.279   | 0.8 (0.5, 1.3)            | 0.403   | 1.5 (1.0, 2.3)            | 0.043   | 1.0 (0.6, 1.6)            | 0.974 |
|                     | 2     | 16 (11) | 2.2 (1.2, 3.9)            | 0.008   | 1.2 (0.6, 2.6)            | 0.600 | 3.0 (1.7, 5.2)            | < 0.001 | 2.2 (1.1, 4.4)            | 0.034   | 2.3 (1.3, 4.0)            | 0.005   | 1.5 (0.7, 3.1)            | 0.297 |
|                     | 3     | 11 (8)  | 4.4 (2.2, 8.8)            | < 0.001 | 2.0 (0.7, 5.9)            | 0.199 | 6.9 (3.5, 13.9)           | < 0.001 | 2.2 (0.8, 6.4)            | 0.136   | 4.7 (2.3, 9.6)            | < 0.001 | 2.2 (0.7, 6.4)            | 0.166 |
| Lateral tibial      | 0     | 93 (66) |                           | #,§     |                           | #     |                           | #,§     |                           | #       |                           | #,§     |                           | #     |
|                     | 1     | 29 (20) | 1.5 (0.9, 2.4)            | 0.087   | 1.1 (0.6, 1.8)            | 0.857 | 2.6 (1.6, 4.2)            | < 0.001 | 1.7 (1.0, 2.9)            | 0.046   | 1.9 (1.2, 3.1)            | 0.006   | 1.4 (0.8, 2.3)            | 0.230 |
|                     | 2     | 10 (7)  | 1.5 (0.7, 3.0)            | 0.282   | 1.3 (0.6, 2.9)            | 0.481 | 1.9 (0.9, 3.9)            | 0.093   | 1.5 (0.7, 3.3)            | 0.339   | 1.6 (0.8, 3.3)            | 0.194   | 1.3 (0.6, 2.8)            | 0.519 |
|                     | 3     | 10 (7)  | 3.0 (1.5, 5.9)            | 0.002   | 2.1 (0.8, 6.1)            | 0.151 | 5.6 (2.8, 11.1)           | < 0.001 | 2.3 (0.8, 6.6)            | 0.134   | 3.1 (1.6, 6.2)            | 0.001   | 1.8 (0.7, 4.9)            | 0.260 |
| Medial compartment  | 0     | 57 (40) |                           | #,§     |                           | #     |                           | #,§     |                           | #       |                           | #,§     |                           | #     |
|                     | 1     | 44 (31) | 2.6 (1.7, 4.0)            | < 0.001 | 1.2 (0.7, 2.2)            | 0.542 | 3.1 (2.0, 4.7)            | < 0.001 | 1.5 (0.9, 2.6)            | 0.141   | 2.3 (1.5, 3.6)            | < 0.001 | 1.3 (0.7, 2.3)            | 0.380 |
|                     | 2     | 19 (13) | 3.8 (2.2, 6.5)            | < 0.001 | 2.0 (0.9, 4.2)            | 0.075 | 6.1 (3.5, 10.7)           | < 0.001 | 2.9 (1.4, 6.0)            | 0.003   | 3.9 (2.2, 6.8)            | < 0.001 | 2.1 (1.0, 4.4)            | 0.042 |
|                     | 3     | 22 (16) | 5.0 (3.0, 8.6)            | < 0.001 | 2.5 (0.8, 8.0)            | 0.109 | 8.9 (5.2, 15.2)           | < 0.001 | 2.6 (0.9, 8.2)            | 0.091   | 5.3 (3.1, 9.2)            | < 0.001 | 2.4 (0.8, 7.0)            | 0.118 |
| Lateral compartment | 0     | 70 (49) |                           | #,§     |                           | #     |                           | #,§     |                           | #       |                           | #,§     |                           | #     |
|                     | 1     | 33 (23) | 2.8 (1.8, 4.5)            | < 0.001 | 1.8 (1.0, 3.0)            | 0.040 | 4.7 (2.9, 7.5)            | < 0.001 | 3.0 (1.7, 5.1)            | < 0.001 | 3.5 (2.2, 5.7)            | < 0.001 | 2.6 (1.5, 4.4)            | 0.001 |
|                     | 2     | 19 (13) | 4.2 (2.4, 7.1)            | < 0.001 | 2.4 (1.2, 4.8)            | 0.014 | 6.6 (3.8, 11.4)           | < 0.001 | 2.9 (1.4, 5.8)            | 0.003   | 5.3 (3.1, 9.0)            | < 0.001 | 3.1 (1.5, 6.2)            | 0.002 |
|                     | 3     | 20 (14) | 4.1 (2.4, 7.0)            | < 0.001 | 2.6 (1.1, 6.0)            | 0.026 | 7.8 (4.5, 13.3)           | < 0.001 | 2.7 (1.2, 6.0)            | 0.017   | 4.8 (2.8, 8.3)            | < 0.001 | 2.9 (1.3, 6.6)            | 0.010 |
| Global              | 0     | 45 (32) |                           | #,§     |                           | #     |                           | #,§     |                           | #       |                           | #,§     |                           | #     |
|                     | 1     | 46 (32) | 2.3 (1.4, 3.6)            | < 0.001 | 0.8 (0.4, 1.7)            | 0.562 | 2.6 (1.6, 4.1)            | < 0.001 | 1.2 (0.6, 2.4)            | 0.528   | 2.1 (1.3, 3.3)            | 0.003   | 1.2 (0.6, 2.3)            | 0.664 |
|                     | 2     | 23 (16) | 4.4 (2.6, 7.6)            | < 0.001 | 1.5 (0.7, 3.3)            | 0.348 | 7.3 (4.2, 12.8)           | < 0.001 | 2.5 (1.2, 5.4)            | 0.015   | 4.8 (2.8, 8.4)            | < 0.001 | 2.1 (0.9, 4.5)            | 0.069 |
|                     | 3     | 28 (20) | 4.8 (2.9, 8.2)            | < 0.001 | 1.5 (0.5, 4.1)            | 0.435 | 8.0 (4.7, 13.6)           | < 0.001 | 1.8 (0.7, 4.7)            | 0.220   | 5.0 (2.9, 8.5)            | < 0.001 | 1.8 (0.7, 4.8)            | 0.209 |

WOMAC – Western Ontario and McMaster Universities Osteoarthritis Index, VAS – visual analogue scale

<sup>1</sup> Adjusted for gender, age and body mass index (BMI).

<sup>2</sup> Adjusted for gender, age, BMI, global femoral cartilage grade, and medial and lateral meniscal extrusion.

# BMI also significantly associated in the model ( $p < 0.05$ ); § age also significantly associated in the model ( $p < 0.05$ )

Supplementary Table S3: Association of ultrasound-defined meniscal extrusion with WOMAC subscales presented as an incidence rate ratio (IRR) and 95% confidence interval (95% CI)

| Meniscal extrusion | n (%)     | WOMAC pain                |                        |                           |                    | WOMAC stiffness           |                        |                           |                    | WOMAC function            |                        |                           |                    |
|--------------------|-----------|---------------------------|------------------------|---------------------------|--------------------|---------------------------|------------------------|---------------------------|--------------------|---------------------------|------------------------|---------------------------|--------------------|
|                    |           | IRR <sup>1</sup> (95% CI) | <i>p</i>               | IRR <sup>2</sup> (95% CI) | <i>p</i>           | IRR <sup>1</sup> (95% CI) | <i>p</i>               | IRR <sup>2</sup> (95% CI) | <i>p</i>           | IRR <sup>1</sup> (95% CI) | <i>p</i>               | IRR <sup>2</sup> (95% CI) | <i>p</i>           |
| Medial             | 142 (100) | 1.3 (1.1, 1.4)            | < 0.001 <sup>#,§</sup> | 1.1 (0.9, 1.2)            | 0.302 <sup>#</sup> | 1.4 (1.2, 1.5)            | < 0.001 <sup>#,§</sup> | 1.1 (1.0, 1.3)            | 0.141 <sup>#</sup> | 1.3 (1.1, 1.4)            | < 0.001 <sup>#,§</sup> | 1.1 (0.9, 1.2)            | 0.420 <sup>#</sup> |
| Lateral            | 142 (100) | 1.0 (0.9, 1.1)            | 0.506 <sup>#,§</sup>   | 0.9 (0.8, 1.0)            | 0.190 <sup>#</sup> | 1.1 (1.0, 1.2)            | 0.102 <sup>#,§</sup>   | 1.0 (0.9, 1.2)            | 0.499 <sup>#</sup> | 1.0 (0.9, 1.1)            | 0.765 <sup>#,§</sup>   | 1.0 (0.8, 1.1)            | 0.542 <sup>#</sup> |

WOMAC – Western Ontario and McMaster Universities Osteoarthritis Index, VAS – visual analogue scale

<sup>1</sup> Adjusted for gender, age and body mass index (BMI).

<sup>2</sup> Adjusted for gender, age, BMI, global osteophyte grade and global femoral cartilage.

# BMI also significantly associated in the model ( $p < 0.05$ ); § age also significantly associated in the model ( $p < 0.05$ )
